# Supplementary material for: Serum microRNA miR-501-3p as a potential biomarker related to the progression of Alzheimer’s disease
Source: Springer Nature journal article supplement (doi:10.1186/s40478-017-0414-z), 2017-01-31
Supplement: MOESM1 [file 25666142]

# Figure S1

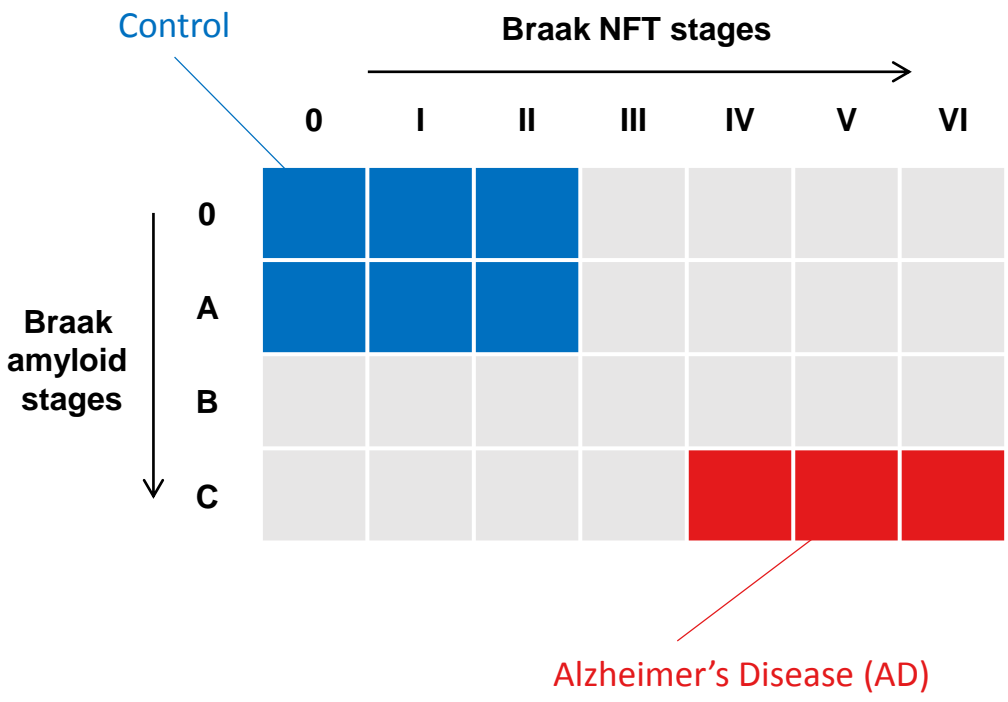

**Figure S1.** This study's definitions of patients with Alzheimer's disease (AD) and controls on the basis of Braak staging in the ROW discovery set. We defined cases with Braak NFT stage IV through VI and Braak amyloid stage C as AD (red-colored cells), and cases with Braak NFT stage 0 through II and Braak amyloid stage 0 or A as controls (blue-colored cells).
